# Supplementary material for: Additive Manufacturing of Lightweight Gypsum and Expanded Polystyrene Granulate Composite
Source: MDPI journal article supplement (doi:10.3390/jcs7100425), 2023-10-10
Supplement: s1 [file s1]

Archive with 1 entries (1 files):
- jcs-2594725-supplementary.pdf
