# Supplementary material for: Additive Manufacturing of Lightweight Gypsum and Expanded Polystyrene Granulate Composite
Source: MDPI journal article supplement (doi:10.3390/jcs7100425), 2023-10-10
Supplement: s1 [file s1 › jcs-2594725-supplementary.pdf]

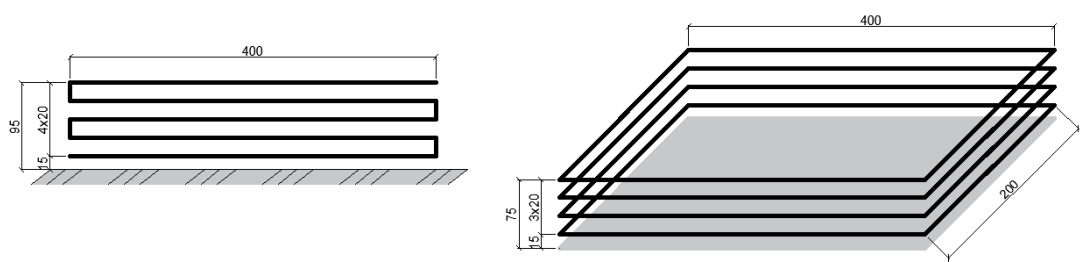

**Figure S1.** Print path of the printed elements

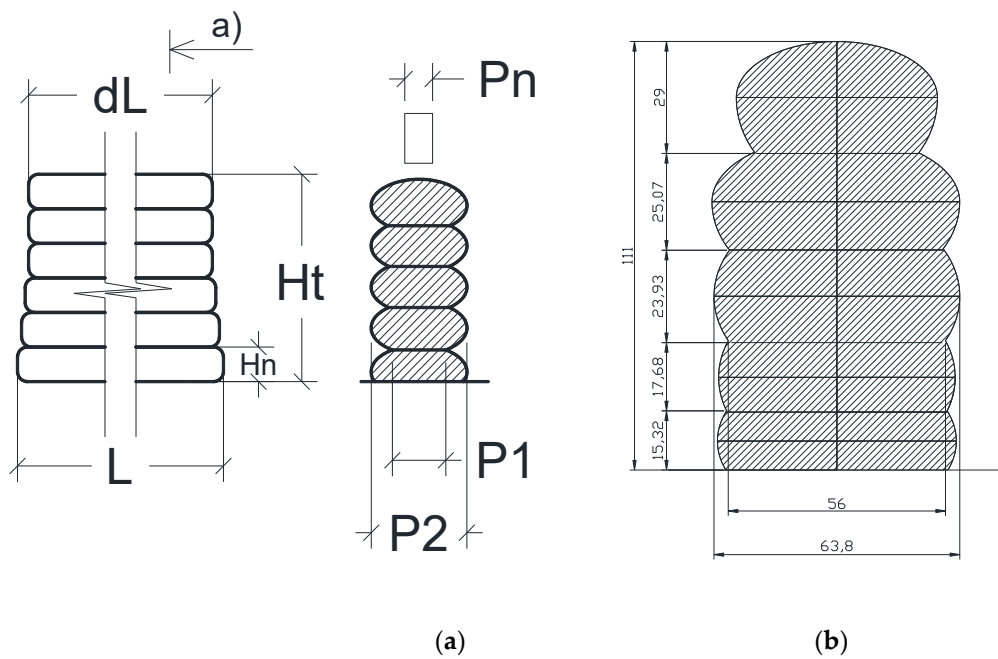

**Figure S2.** a) Measurements of 3D printed object layer height and cross-section width; b) Measurement of 3D printed EPS-gypsum sample cross-section. L - length of the printed sample; dL - length of the 3D printed object upper layer; Ht - total height of the sample; Hn - height of an individual layer; Pn - nozzle width; P2 - printed layer max width; P1 - printed layer transition zone width.
